# Supplementary material for: ATG5 overexpression is neuroprotective and attenuates cytoskeletal and vesicle-trafficking alterations in axotomized motoneurons
Source: PubMed Central journal article supplement (PMC5967323; doi:10.1038/s41419-018-0682-y), 2018-05-24
Supplement: 41419_2018_682_MOESM1_ESM.pdf [file 41419_2018_682_MOESM1_ESM.pdf]

## **ATG5 Overexpression is Neuroprotective and Attenuates Cytoskeletal and Vesicle-Trafficking Alterations in Axotomized Motoneurons**

Tatiana Leiva-Rodríguez<sup>1</sup>, David Romeo-Guitart<sup>1</sup>, Sara Marmolejo-Martínez-Artesero<sup>1</sup>, Mireia Herrando-Grabulosa<sup>1</sup>, Assumpció Bosch<sup>2</sup>, Joaquim Forés<sup>3</sup>, and Caty Casas<sup>1\*</sup>

<sup>1</sup> *Institut de Neurociències* and Department of Cell Biology, Physiology and Immunology, *Universitat Autònoma de Barcelona (UAB)*, and Centro de Investigación Biomédica en Red sobre Enfermedades Neurodegenerativas (CIBERNED), 08193 Bellaterra, Barcelona, Spain.

<sup>2</sup> Department of Biochemistry and Molecular Biology, Center of Animal Biotechnology and Gene Therapy (CBATEG), UAB, CIBERNED.

<sup>3</sup> Hand and Peripheral Nerve Unit, Hospital Clínic i Provincial, *Universitat de Barcelona*, Barcelona, Spain.

\* **Corresponding author:** Caty Casas Louzao, Unitat de Fisiologia Mèdica, Edif. M, Universitat Autònoma de Barcelona, E-08193 Bellaterra, Barcelona, Spain. Tel: +34-935811324, Fax: +34-935812986, E-mail: [Caty.Casas@uab.cat](mailto:Caty.Casas@uab.cat)

### **SUPPLEMENTARY INFORMATION**

- **Supplementary Tables and Headings**
- **Supplementary Figures and Legends**

# SUPPLEMENTARY TABLES AND HEADINGS

Supplementary table S1

| Table S1. Fold change of microtubule and vesicle related proteins by proteomics |                                                                            |            |        |           |         |      |            |
|---------------------------------------------------------------------------------|----------------------------------------------------------------------------|------------|--------|-----------|---------|------|------------|
| GO:0015630 Microtubule cytoskeleton                                             |                                                                            |            |        |           |         |      |            |
| ID                                                                              | Protein                                                                    | Short Name | Fold   | Std Error | t value | DF   | p value    |
| Q7TP36                                                                          | Protein Shroom2                                                            | SHRM2      | -3,04  | 0,11      | -27,97  | 56   | 0          |
| P34067                                                                          | Proteasome subunit beta type-4                                             | PSB4       | -1,16  | 0,14      | -8,55   | 137  | 4,64E-13   |
| Q63560                                                                          | Microtubule-associated protein 6                                           | MAP6       | -1,00  | 0,06      | -17,85  | 280  | 0          |
| P63004                                                                          | Platelet-activating factor acetylhydrolase IB subunit alpha                | LS1        | -0,56  | 0,07      | -8,03   | 416  | 2,27E-13   |
| Q9Z1E1                                                                          | Flotillin-1                                                                | FLOT1      | -0,51  | 0,09      | -5,49   | 8    | 0,00298825 |
| Q7M6Z5                                                                          | Kinesin-like protein KIF27                                                 | KIF27      | -0,45  | 0,10      | -4,53   | 14   | 0,00252115 |
| P23928                                                                          | Alpha-crystallin B chain                                                   | CRYAB      | -0,45  | 0,11      | -3,88   | 111  | 0,00108087 |
| B08NF1                                                                          | Septin-8                                                                   | SEPTIN8    | -0,40  | 0,08      | -4,95   | 37   | 0,0001273  |
| Q9WVC0                                                                          | Septin-7                                                                   | SEPTIN7    | -0,39  | 0,09      | -4,21   | 164  | 0,000232   |
| P56536                                                                          | Kinesin heavy chain isoform 5C                                             | KIF5C      | -0,39  | 0,08      | -4,96   | 15   | 0,00104572 |
| P62161                                                                          | Calmodulin OS-Rattus norvegicus                                            | CALM       | -0,32  | 0,09      | -3,52   | 247  | 0,00263141 |
| P85515                                                                          | Alpha-centractin                                                           | ACTZ       | -0,31  | 0,12      | -2,48   | 203  | 0,04239646 |
| P38650                                                                          | Cytoplasmic dynein 1 heavy chain 1                                         | DYHC1      | -0,28  | 0,03      | -9,62   | 2339 | 0          |
| O55156                                                                          | CAP-Gly domain-containing linker protein 2                                 | CLIP2      | -0,18  | 0,05      | -3,50   | 132  | 0,00317932 |
| Q9QXU8                                                                          | Cytoplasmic dynein 1 light intermediate chain 1                            | DC1L1      | -0,17  | 0,06      | -2,84   | 175  | 0,01821581 |
| P63331                                                                          | Serine/threonine-protein phosphatase 2A catalytic subunit alpha isoform    | PP2AA      | 0,16   | 0,05      | 3,28    | 16   | 0,01719956 |
| Q3KRE8                                                                          | Tubulin beta-2B chain                                                      | TBB2B      | 0,25   | 0,08      | 3,22    | 16   | 0,01915378 |
| Q04631                                                                          | protein farnesyltransferase/geranylgeranyltransferase type-1 subunit alpha | FNTA       | 0,26   | 0,08      | 3,39    | 118  | 0,00451095 |
| Q02293                                                                          | Protein farnesyltransferase subunit beta                                   | FNTB       | 0,34   | 0,13      | 2,72    | 22   | 0,03921408 |
| Q62812                                                                          | Myosin-9                                                                   | MYH9       | 0,68   | 0,12      | 5,87    | 98   | 7,03E-07   |
| P31577                                                                          | Ezrin                                                                      | EZR1       | 2,37   | 0,26      | 9,25    | 8    | 0,0001186  |
| P37397                                                                          | Calponin-3                                                                 | CNN3       | 3,35   | 0,17      | 19,63   | 36   | 0          |
| Q6AYZ1                                                                          | Tubulin alpha-1C chain                                                     | TBA1C      | 9,33   | 0,28      | 32,95   | 12   | 7,87E-12   |
| GO:0031988 Membrane-bounded vesicle                                             |                                                                            |            |        |           |         |      |            |
| ID                                                                              | Protein                                                                    | Short Name | Fold   | Std Error | t value | DF   | p value    |
| Q9Z216                                                                          | Synaptic vesicle glycoprotein 2C                                           | SV2C       | -0,66  | 0,25      | -2,58   | 47   | 0,04016482 |
| P02770                                                                          | Serum albumin OS-Rattus norvegicus                                         | ALBU       | -0,58  | 0,06      | -9,56   | 548  | 0          |
| Q63377                                                                          | Sodium/potassium-transporting ATPase subunit beta-3                        | AT1B3      | -0,57  | 0,21      | -2,73   | 56   | 0,02829316 |
| P12785                                                                          | Fatty acid synthase                                                        | FAS        | -0,55  | 0,05      | -12,24  | 1042 | 0          |
| P06685                                                                          | Sodium/potassium-transporting ATPase subunit alpha-1                       | AT1A1      | -0,53  | 0,07      | -7,22   | 312  | 7,34E-11   |
| Q9Z1E1                                                                          | Flotillin-1 OS-Rattus norvegicus                                           | FLOT1      | -0,51  | 0,09      | -5,49   | 8    | 0,00298825 |
| P08082                                                                          | Clathrin light chain B OS-Rattus norvegicus                                | CLCB       | -0,46  | 0,06      | -7,63   | 16   | 9,84E-06   |
| Q9IKE3                                                                          | Secretory carrier-associated membrane protein 5                            | SCAM5      | -0,45  | 0,10      | -4,77   | 16   | 0,00126997 |
| P62824                                                                          | Ras-related protein Rab-3C                                                 | RAB3C      | -0,45  | 0,13      | -3,51   | 53   | 0,00443394 |
| Q05683                                                                          | Glutamate decarboxylase 2                                                  | DCE2       | -0,44  | 0,18      | -2,51   | 63   | 0,04413076 |
| P10824                                                                          | Guanine nucleotide-binding protein (G(i)) subunit alpha-1                  | GNAI1      | -0,39  | 0,06      | -6,91   | 38   | 4,02E-07   |
| P11598                                                                          | Protein disulfide-isomerase A3                                             | PDI3A      | -0,38  | 0,06      | -5,93   | 378  | 8,64E-08   |
| P29101                                                                          | Synaptotagmin-2                                                            | SYT2       | -0,36  | 0,10      | -3,65   | 237  | 0,00179161 |
| Q9QVF3                                                                          | Unconventional myosin-Va                                                   | MYO5A      | -0,35  | 0,07      | -5,35   | 172  | 2,89E-06   |
| P08413                                                                          | Calcium/calmodulin-dependent protein kinase type II subunit beta           | Camk2B     | -0,34  | 0,10      | -3,44   | 86   | 0,00436509 |
| Q63941                                                                          | Ras-related protein Rab-3B                                                 | RAB3B      | -0,33  | 0,11      | -3,04   | 31   | 0,01743794 |
| P21707                                                                          | Synaptotagmin-1                                                            | SYT1       | -0,33  | 0,08      | -4,24   | 120  | 0,00030561 |
| Q04639                                                                          | Apolipoprotein A-I                                                         | APOA1      | -0,32  | 0,09      | -3,68   | 51   | 0,00286613 |
| P6P6R2                                                                          | Dihydropyridyl dehydrogenase, mitochondrial                                | DLDH       | -0,30  | 0,07      | -4,22   | 223  | 0,00025467 |
| P63012                                                                          | Ras-related protein Rab-3A                                                 | RAB3A      | -0,29  | 0,09      | -3,05   | 142  | 0,01117429 |
| P05712                                                                          | Ras-related protein Rab-2A                                                 | RAB2A      | -0,27  | 0,06      | -4,48   | 190  | 0,00010494 |
| Q6AXT5                                                                          | Ras-related protein Rab-21                                                 | RAB21      | -0,25  | 0,10      | -2,49   | 51   | 0,04811081 |
| P13233                                                                          | 2',3'-cyclic-nucleotide 3'-phosphodiesterase                               | CN37       | -0,25  | 0,06      | -3,96   | 559  | 0,0005567  |
| P11442                                                                          | Clathrin heavy chain 1                                                     | CLH        | -0,25  | 0,04      | -6,46   | 1787 | 2,10E-09   |
| P62815                                                                          | V-type proton ATPase subunit B, brain isoform                              | VATB2      | -0,23  | 0,07      | -3,05   | 639  | 0,01005739 |
| Q9QXU9                                                                          | ProSAAS                                                                    | PCSK1      | -0,20  | 0,05      | -4,12   | 105  | 0,0004988  |
| O55156                                                                          | CAP-Gly domain-containing linker protein 2                                 | CLIP2      | -0,18  | 0,05      | -3,50   | 132  | 0,00317932 |
| P63039                                                                          | 60 kDa heat shock protein, mitochondrial                                   | CH60       | -0,17  | 0,07      | -2,45   | 645  | 0,04352197 |
| P47709                                                                          | Rabphilin-3A                                                               | RP3A       | -0,16  | 0,07      | -2,49   | 183  | 0,04127707 |
| P06761                                                                          | 78 kDa glucose-regulated protein                                           | GRP78      | 0,15   | 0,04      | 3,48    | 435  | 0,00280816 |
| Q9QXQ0                                                                          | Alpha-actinin-4                                                            | ACTN4      | 0,16   | 0,06      | 2,94    | 374  | 0,01364871 |
| P24368                                                                          | Peptidyl-prolyl cis-trans isomerase B                                      | PIIB       | 0,30   | 0,10      | 3,08    | 99   | 0,01100049 |
| P31044                                                                          | Phosphatidylethanolamine-binding protein 1                                 | RKIP       | 0,30   | 0,11      | 2,72    | 228  | 0,02394697 |
| Q63081                                                                          | Protein disulfide-isomerase A6                                             | PDI6A      | 0,31   | 0,10      | 3,13    | 152  | 0,00878527 |
| Q5X1E0                                                                          | Acidic leucine-rich nuclear phosphoprotein 32 family member E              | AN32E      | 0,33   | 0,09      | 3,73    | 6    | 0,03126756 |
| P52555                                                                          | Endoplasmic reticulum resident protein 29                                  | ERP29      | 0,34   | 0,05      | 6,36    | 66   | 2,72E-07   |
| P07153                                                                          | Dolichyl-diphosphooligosaccharide-protein glycosyltransferase subunit 1    | RPN1       | 0,35   | 0,07      | 5,83    | 88   | 1,06E-06   |
| P04785                                                                          | Protein disulfide-isomerase                                                | PDI1A      | 0,40   | 0,09      | 4,39    | 296  | 0,00012347 |
| Q8CGU6                                                                          | Nicastrin                                                                  | NICA       | 0,44   | 0,15      | 2,96    | 13   | 0,03523719 |
| P37361                                                                          | Methionine-3                                                               | MT3        | 0,48   | 0,16      | 2,93    | 20   | 0,02744153 |
| Q4AEF8                                                                          | Coatomer subunit gamma-1                                                   | COPG1      | 0,52   | 0,13      | 3,86    | 41   | 0,00216109 |
| Q6RUV5                                                                          | Ras-related C3 botulinum toxin substrate 1                                 | RAC1       | 0,53   | 0,17      | 3,22    | 67   | 0,00838511 |
| P14562                                                                          | Lysosome-associated membrane glycoprotein 1                                | LAMP1      | 0,61   | 0,11      | 5,37    | 45   | 2,41E-05   |
| Q91ZN1                                                                          | Coronin-1A                                                                 | COR1A      | 0,63   | 0,10      | 6,53    | 92   | 4,78E-08   |
| P00787                                                                          | Cathepsin B                                                                | CATB       | 0,74   | 0,16      | 4,60    | 185  | 6,78E-05   |
| A8WCF8                                                                          | Tumor protein p63-regulated gene 1-like protein                            | TPRGL      | 0,87   | 0,30      | 2,89    | 37   | 0,02253646 |
| Q6GHD0                                                                          | Endoplasmic reticulum protein                                              | ENRPL      | 1,20   | 0,17      | 7,17    | 74   | 6,82E-09   |
| P17475                                                                          | Alpha-1-antitrypsin                                                        | A1AT       | 1,57   | 0,07      | 22,55   | 109  | 0          |
| P38659                                                                          | Protein disulfide-isomerase A4                                             | PDI4A      | 1,69   | 0,09      | 18,91   | 52   | 0          |
| Q6AYC4                                                                          | Macrophage-capping protein                                                 | CAPG       | 1,74   | 0,10      | 17,12   | 101  | 0          |
| P49134                                                                          | Integrin beta-1                                                            | ITB1       | 4,55   | 0,12      | 37,16   | 26   | 0          |
| P06238                                                                          | Alpha-2-macroglobulin                                                      | A2MG       | 8,08   | 0,04      | 188,46  | 13   | 0          |
| Q9ESR9                                                                          | ATP-binding cassette sub-family A member 2                                 | ABCA2      | 9,76   | 0,02      | 406,61  | 7    | 0          |
| GO:0060627 regulation of vesicle-mediated transport                             |                                                                            |            |        |           |         |      |            |
| ID                                                                              | Protein                                                                    | Short Name | Fold   | Std Error | t value | DF   | p value    |
| Q9JIR3                                                                          | Regulating synaptic membrane exocytosis protein 3                          | RIMS3      | -1,046 | 0,08488   | -12,33  | 5    | 0,0004234  |
| Q9CWN8                                                                          | Spectrin beta chain, brain 2                                               | SPTN2      | -0,696 | 0,10844   | -6,419  | 92   | 7,73E-08   |
| P08082                                                                          | Clathrin light chain B                                                     | CLCB       | -0,464 | 0,06083   | -7,628  | 16   | 9,84E-06   |
| P08082                                                                          | Clathrin light chain B                                                     | CLCB       | -0,464 | 0,06083   | -7,628  | 16   | 9,84E-06   |
| Q9IKE3                                                                          | Secretory carrier-associated membrane protein 5                            | SCAM5      | -0,454 | 0,09517   | -4,767  | 16   | 0,00126997 |
| P62824                                                                          | Ras-related protein Rab-3C                                                 | RAB3C      | -0,45  | 0,12808   | -3,512  | 53   | 0,00443394 |
| P10824                                                                          | Guanine nucleotide-binding protein (G(i)) subunit alpha-1                  | GNAI1      | -0,387 | 0,05606   | -6,907  | 38   | 4,02E-07   |
| O35964                                                                          | Endophilin-A2                                                              | SH3G1      | -0,363 | 0,09542   | -3,804  | 56   | 0,00194406 |
| P29101                                                                          | Synaptotagmin-2                                                            | SYT2       | -0,363 | 0,09932   | -3,654  | 237  | 0,00179161 |
| P61265                                                                          | Syntaxin-1B                                                                | STX1B      | -0,354 | 0,09272   | -3,816  | 336  | 0,00100266 |
| Q9Z5N3                                                                          | PEX5-related protein                                                       | PEX5R      | -0,347 | 0,10823   | -3,203  | 14   | 0,0225164  |
| P21707                                                                          | Synaptotagmin-1                                                            | SYT1       | -0,33  | 0,07792   | -4,241  | 120  | 0,00030561 |
| Q6RUV5                                                                          | Reticulon-3                                                                | RTN3       | -0,319 | 0,05911   | -5,398  | 144  | 2,88E-06   |
| P63012                                                                          | Ras-related protein Rab-3A                                                 | RAB3A      | -0,289 | 0,0949    | -3,049  | 142  | 0,01117429 |
| P05712                                                                          | Ras-related protein Rab-2A                                                 | RAB2A      | -0,272 | 0,06084   | -4,479  | 190  | 0,00010494 |
| P61023                                                                          | Calcium-binding protein p22                                                | CHP1       | -0,263 | 0,0995    | -2,648  | 45   | 0,03523719 |
| P11442                                                                          | Clathrin heavy chain 1                                                     | CLH        | -0,254 | 0,03929   | -6,464  | 1787 | 2,10E-09   |
| Q99N27                                                                          | Sorting nexin-1                                                            | SNX1       | 0,146  | 0,05728   | 2,5422  | 88   | 0,03961777 |
| Q62940                                                                          | E3 ubiquitin-protein ligase NEDD4                                          | NEDD4      | 0,204  | 0,0639    | 3,1972  | 83   | 0,00838511 |
| P17077                                                                          | 60S ribosomal protein L9                                                   | RL9        | 0,419  | 0,13978   | 2,9957  | 81   | 0,01390317 |
| P02650                                                                          | Apolipoprotein E                                                           | APOE       | 0,438  | 0,08778   | 4,9893  | 183  | 1,32E-05   |
| P63025                                                                          | Vesicle-associated membrane protein 3                                      | VAMP3      | 0,467  | 0,0646    | 7,2357  | 7    | 0,0010564  |
| Q4AEF8                                                                          | Coatomer subunit gamma-1                                                   | COPG1      | 0,516  | 0,1338    | 3,8565  | 41   | 0,00216109 |
| Q6RUV5                                                                          | Ras-related C3 botulinum toxin substrate 1                                 | RAC1       | 0,535  | 0,16598   | 3,231   | 67   | 0,00838511 |
| P61751                                                                          | ADP-ribosylation factor 4                                                  | ARF4       | 0,558  | 0,11304   | 4,9402  | 9    | 0,00397693 |
| Q91ZN1                                                                          | Coronin-1A                                                                 | COR1A      | 0,626  | 0,09578   | 6,5329  | 92   | 4,78E-08   |
| Q66H80                                                                          | Coatomer subunit delta                                                     | COPD       | 0,831  | 0,17141   | 4,8493  | 69   | 6,36E-05   |

## SUPPLEMENTARY FIGURES AND LEGENDS

### Supplementary Figure S1

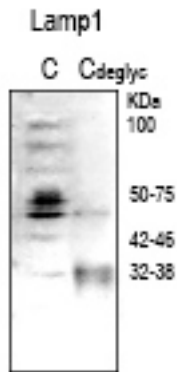

Supplementary Fig. S1. Western blot with anti-Lamp1 using sample of L4-L5 spinal cord extract from a control rat (C) and the same after being deglycosylated for 18h (C<sub>deglyc</sub>). Note totally shift of band pattern.

### Supplementary Figure S2

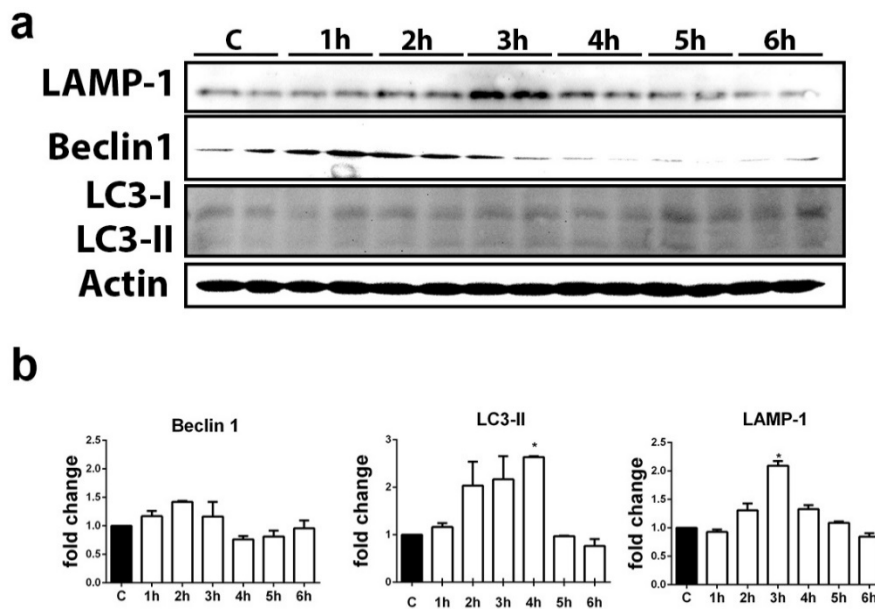

Supplemental Figure S2. Ncs34 cell time-course response to rapamycin treatment. (a) Immunoblotting of key autophagy-related molecules after 10  $\mu$ M rapamycin added to the culture

medium for different time exposition. **(b)** Bar graph of fold change of Beclin, LC3II and LAMP1 at different time-points respect to actin values.

**Supplementary Figure S3**

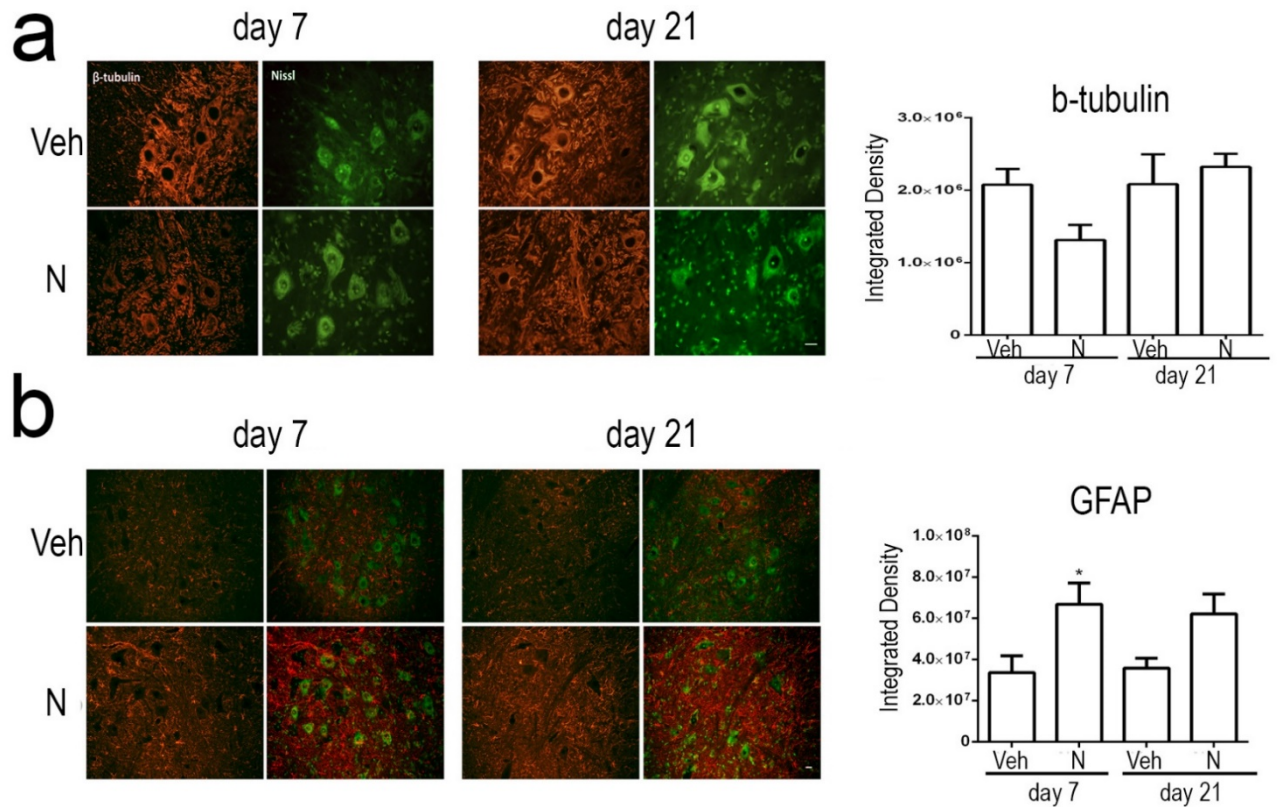

Supplementary Figure S3. **(a) Left**, Representative microphotographs of  $\beta$ -tubulin (red) and green fluorescent Nissl of MNs at the ventral horns of the spinal cord from animals receiving either vehicle (Veh) or nocodazole (N) injection at 7 or 21 days post injection. **Right**, Bar graphs of the integrated density for  $\beta$ -tubulin within MNs at the different conditions. **(b)** Images and bar graphs of immunoreactivity analysis for GFAP staining (red) at the ventral horns with MNs labelled in green (Nissl) at the same conditions described. Scale bar= 25  $\mu$ m.
